# 1           **Perioperative changes in oxygen consumption:** 2           **estimations from minimal-invasive cardiac output and** 3           **a-cvO<sub>2</sub> difference parallel to indirect calorimetry**

4  
5 Julia Jakobsson<sup>1,2,\*,#a</sup>, Carl Norén<sup>3</sup>, Eva Hagel<sup>4,#b</sup>, Magnus Backheden<sup>4</sup>, Sigridur Kalman<sup>1,2</sup>,  
6 Erzsébet Bartha<sup>1,2</sup>

7  
8 <sup>1</sup>Department of Clinical Science, Intervention and Technology (CLINTEC), Division of  
9 Anaesthesia and Intensive Care, Karolinska Institutet, Stockholm, Sweden

10 <sup>2</sup>Department of Perioperative Medicine and Intensive Care, Karolinska University Hospital  
11 Huddinge, Stockholm, Sweden

12 <sup>3</sup>Department of Anaesthesia and Intensive Care, Nyköping County Hospital, Nyköping,  
13 Sweden

14 <sup>4</sup>Department of Learning, Information, Management and Ethics (LIME), Medical Statistics  
15 Unit, Karolinska Institutet, Stockholm, Sweden

16  
17 <sup>#a</sup> Current address: Dept. of Cardiothoracic Surgery, Anaesthesia and Intensive Care, Uppsala  
18 University Hospital, Uppsala, Sweden

19 <sup>#b</sup> Current address: Soristat, Stockholm, Sweden

20  
21  
22 \* Corresponding author:

23 E-mail: [julia.o.jakobsson@akademiska.se](mailto:julia.o.jakobsson@akademiska.se) or [julialjakobsson@icloud.com](mailto:julialjakobsson@icloud.com)

24  
25 ORCID-ID:

26 Julia Jakobsson 0000-0002-5956-9942

27 Erzsébet Bartha 0000-0001-5048-4574

28  
29  
30  
31  
32  
33 **NOTE: This preprint reports new research that has not been certified by peer review and should not be used to guide clinical practice.**

## 34 **Abstract**

35  
36 Feasible estimations of perioperative changes in oxygen consumption could enable larger  
37 studies of its role in postoperative outcomes. Current methods, by pulmonary artery  
38 catheterisation or breathing gas analysis, are often regarded as either invasive or technically  
39 requiring. In this pilot study, we investigated the relationship between estimations of oxygen  
40 consumption, based on minimal-invasive cardiac output and arterial-central venous blood gas  
41 sampling, and indirect calorimetry in the perioperative period using the data collected during  
42 a clinical trial on perioperative oxygen transport.

43 In 20 patients >65 years during epidural and general anaesthesia for open abdominal surgery,  
44 Fick-based estimations of oxygen consumption( $EVO_2$ ), the product of cardiac output from  
45  $LiDCO^{TM}plus$ ( $LiDCO$  Ltd, Cambridge, UK) and arterial-central venous oxygen content  
46 difference, were compared with indirect calorimetry( $GVO_2$ ) using  $QuarkRMR$ ( $COSMED$ , srl.  
47 Italy). Eighty-five simultaneous intra- and postoperative measurements at different time-  
48 points were analysed for prediction, parallelity and by traditional agreement assessment.

49 There was an overall association between  $GVO_2$  and  $EVO_2$ ,  $73(95\% \text{ CI } 62 \text{ to } 83) + 0.45(95\%$   
50  $\text{ CI } 0.29 \text{ to } 0.61) EVO_2 \text{ ml min}^{-1}\text{m}^{-2}$ ,  $P<0.0001$ .  $GVO_2$  and  $EVO_2$  changed in parallel intra- and  
51 postoperatively when normalised to their respective overall means. Unadjusted mean  
52 difference between  $GVO_2$  and  $EVO_2$  indexed for body surface area was  $26(95\% \text{ CI } 20 \text{ to } 32)$   
53 with limits of agreement (1.96SD) of  $-32 \text{ to } 85 \text{ ml min}^{-1}\text{m}^{-2}$  and did not change over time.

54 There was low correlation for absolute agreement,  $ICC(A,1) 0.37(95\% \text{ CI } 0.34 \text{ to } 0.65)$   
55  $[F(84,10.2)=3.07, P=0.0266]$ .

56 Despite lack of absolute agreement, the estimated oxygen consumption changed in parallel to  
57 the metabolic measurements in the perioperative period. Prediction or trending of oxygen  
58 consumption by this or similar methods could be further evaluated in larger samples.

59  
60  
61  
62  
63  
64  
65  
66  
67  
68  
69  
70  
71

## 72 **Introduction**

73

74 A postoperative imbalance between oxygen consumption and delivery, leading to increased  
75 oxygen extraction, has been associated with increased morbidity and mortality after major  
76 surgery.(1) The focus of goal-directed haemodynamic therapy (GDHT) has traditionally been  
77 on oxygen delivery, which is often easier to assess and to develop measurable optimisation  
78 strategies for.(2) Recently, interest is growing to reassess perioperative oxygen consumption  
79 in current surgical populations using modern monitoring and analytic methodologies.(3-5)  
80 Feasible estimations could enable larger studies on the role of oxygen consumption in  
81 postoperative outcomes. Available techniques, by pulmonary artery catheterisation or indirect  
82 calorimetry, are either deemed too invasive or difficult to manage in a clinical study setting  
83 during non-cardiac surgery. Using oxygen uptake calculated from fractions of inspiratory and  
84 expiratory oxygen in the closed breathing circuit during low-flow anaesthesia(6) has not  
85 demonstrated agreement when compared to standard methods.(7) Importantly, it can not be  
86 used in awake patients in the postoperative period. Commonly used haemodynamic  
87 monitoring in major surgery, such as minimal-invasive cardiac output with arterial and central  
88 venous access, could offer a possibility not only to estimate intra- and postoperative oxygen  
89 consumption but also to follow changes over time. By substituting mixed with central venous  
90 oxygen content and using the cardiac output derived from a minimal-invasive monitor, an  
91 estimation of oxygen consumption can be calculated by the reverse Fick principle.(8) The  
92 lack of absolute agreement between calorimetric and Fick-based methods has been reported  
93 previously, the latter do not include pulmonary oxygen consumption and global oxygen  
94 consumption values are usually reported around 20-40 ml min<sup>-1</sup>m<sup>-2</sup> lower compared to those  
95 obtained from breathing gas analysis.(9-11) Yet, if this bias remains unchanged in the intra-  
96 and postoperative period, such estimations could be studied in larger samples and related to  
97 other clinical parameters and outcomes.

98 Our aim of this pilot study was to investigate the relationship and temporal changes between  
99 estimations of oxygen consumption, based on minimal-invasive cardiac output monitoring  
100 and arterial-central venous blood gas samples (EVO<sub>2</sub>), and measurements by indirect  
101 calorimetry (GVO<sub>2</sub>) in the perioperative period using the data collected during our oxygen  
102 transport study in elderly undergoing major abdominal surgery.(12)

103

104

105

## 106 **Materials and methods**

107  
108 The present analysis was a secondary objective of a prospective observational study on  
109 perioperative oxygen transport in elderly patients undergoing major upper abdominal surgery  
110 (clinicaltrials.gov NCT03355118). The Regional Ethics Review Board of the Stockholm  
111 Region (ID 2017/291-31/4) approved the study and written informed consent was obtained  
112 from all participants. The primary aim of the study, i.e. the perioperative oxygen transport  
113 changes, has been published.<sup>(12)</sup> Data collection and analysis for the present publication were  
114 pre-planned and conducted simultaneously. The original cohort data was prospectively  
115 collected 2017-2018.

## 117 **Patients and settings**

118 A detailed description of the selection criteria, patient characteristics, perioperative  
119 management and oxygen transport outcomes can be found in the previous publication.<sup>(12)</sup> As  
120 stated there, 20 ASA II-IV patients over 65 years undergoing open pancreatic or liver  
121 resection surgery in epidural and general anaesthesia were included. The study was conducted  
122 at the Karolinska University Hospital in Huddinge, a tertiary referral center for upper  
123 abdominal surgery.

## 125 **Data extraction and time-points**

126 Paired values of oxygen consumption by estimations based on minimal-invasive cardiac  
127 output monitoring and arterial-central venous blood gas samples ( $EVO_2$ ) and indirect  
128 calorimetry ( $GVO_2$ ) from five perioperative time-points were analysed; T1: during  
129 anaesthesia, right before surgical skin incision; T2: early during surgery, directly after skin  
130 incision; T3: later during surgery, >2h after skin incision; T4: early postoperatively, <12h  
131 after extubation; T5: late postoperatively, on postoperative day 1. The mean values for  $GVO_2$   
132 during the approximate 20-minute measurement periods were compared with simultaneous  
133 cardiac output measurements averaged for each minute exported from LiDCOviewPRO  
134 (LiDCO Ltd, Cambridge, UK). The blood gas parameters were calculated as means of two  
135 simultaneously drawn arterial and central venous samples at 5 and 15 minutes into the  
136 measurement period.

137

138

## 139 **Measurements of VO<sub>2</sub> by indirect calorimetry (GVO<sub>2</sub>)**

140 Indirect calorimetry was performed by QuarkRMR (COSMED srl, Italy). This device applies  
141 a breath-by-breath technique to measure gas flow and concentrations that are synchronised by  
142 data processing algorithms. The Haldane transformation is used to calculate oxygen  
143 consumption.(13) During intraoperative measurements, the flow meter (Flow-REE,  
144 COSMED srl, Italy), gas sampling line and moist filter were placed between the endotracheal  
145 tube and the Y-piece of the ventilator. The ventilator was set to a fresh gas flow of 2 L min<sup>-1</sup>  
146 and FiO<sub>2</sub> of 0.5 during measurements to allow for gas sampling. All other ventilation settings  
147 were left unchanged. Postoperative measurements were made with a tight-fitting face mask  
148 connected to a bidirectional turbine flow meter and a gas sampling line. No supplemental  
149 oxygen was administered during the postoperative measurements. The calorimeter was  
150 calibrated before start of intraoperative measurements and before each postoperative  
151 measurement after a warm-up time of 20 minutes with a standardised gas mixture containing  
152 16% oxygen and 5% carbon dioxide. The gas sampling line, Flow-REE and moist filter were  
153 changed before each measurement (except before T2, continuous to T1) and all flowmeters  
154 were calibrated with a 3L-syringe.

## 156 **Estimation of VO<sub>2</sub> by minimal-invasive cardiac output and** 157 **arterial-central venous oxygen content difference (EVO<sub>2</sub>)**

158 EVO<sub>2</sub> was calculated by the reverse Fick's principle with central venous instead of pulmonary  
159 artery blood using the following formulas:(14)

$$160 \quad EVO_2 = CO \times Ca-cvO_2 \times 10$$

$$161 \quad Ca-cvO_2 = Hb \times 1.31 \times (SaO_2 - ScvO_2) + 0.0225 \times (PaO_2 - PcvO_2)$$

162 [CO; cardiac output in L min<sup>-1</sup>, Ca-cvO<sub>2</sub>; oxygen content difference between arterial and  
163 central venous blood in ml dl<sup>-1</sup>, Hb; haemoglobin in g dl<sup>-1</sup>, SaO<sub>2</sub>; arterial oxygen saturation,  
164 ScvO<sub>2</sub>; central venous saturation, PaO<sub>2</sub>; partial pressure of oxygen in arterial blood, PcvO<sub>2</sub>;  
165 partial pressure of oxygen in central venous blood, constants 1.31 and 0.0225, referring to the  
166 Hüfner constant and the solubility coefficient of oxygen (ml O<sub>2</sub> dl<sup>-1</sup> kPa<sup>-1</sup>), and 10 as a  
167 conversion factor from dL to L.]

168 Cardiac output was obtained from LiDCO™plus (LiDCO Ltd, Cambridge, UK). The device  
169 was calibrated and recalibrated according to the manufacturer's instructions. Missing values  
170 from CO measurements (averaged for each minute) were substituted by linear interpolation if  
171 no more than 3 data points and no major haemodynamic changes occurred. Blood gases were

172 analysed immediately after sampling by ABL800 Flex or ABL90 Flex (Radiometer Medical  
173 ApS, Denmark). Cardiac output and measured oxygen consumption were indexed for body  
174 surface area using the DuBois formula yielding values of  $GVO_2$  and  $EVO_2$  in  
175  $ml\ min^{-1}m^{-2}$ .(15)

176

## 177 **Statistical analysis**

178 The sample size calculation was performed for the primary study, in which 20 patients were  
179 expected to demonstrate a relevant change in oxygen consumption after induction of  
180 anaesthesia. This would yield a maximum of 100 paired measurements of  $EVO_2$  and  $GVO_2$   
181 which was considered sufficient even in the presence of >10% data loss. Continuous data was  
182 tested for normality distribution and statistical tests applied accordingly. Statistical analyses  
183 were performed and constructed in R (version 3.5.3; R Foundation for Statistical Computing,  
184 Vienna, Austria, URL; <https://www.R-project.org>) and SAS (version 9.4; SAS Institute Inc,  
185 Cary, NC, U.S.). The statisticians conducting the analyses were not involved in the data  
186 collection. Mean difference between  $EVO_2$  and  $GVO_2$  with 95% confidence interval were  
187 calculated from the individual paired measurements and grouped by time point (T1-5). These  
188 changes over time were analysed by linear mixed models with Holm-adjusted Tukey post-hoc  
189 tests. To investigate the overall association between  $EVO_2$  and  $GVO_2$ , a random coefficient  
190 model was used based on individual slopes and coefficients. Analyses of the perioperative  
191 changes over time of  $GVO_2$  compared to  $EVO_2$  and its input variables (*CI*; cardiac index and  
192  $Ca-cvO_2$ ) were conducted by random effect mixed models with method or component and  
193 time as fixed effects. Adjustment for differences in variances of the methods or components  
194 was made. In these models, the relative changes were normalised to the patients' individual  
195 baseline measurements (T1). In the model analysing changes of each method in awake and  
196 anaesthetised subjects, the changes were normalised to the respective overall mean.  
197 Traditional agreement assessment was also performed by intraclass correlation and Bland-  
198 Altman analysis. Single score intraclass correlation was used, a in a two-way model yielding  
199 ICC coefficients with 95% CI. Bias and limits of agreement with 95% CI was visualised in  
200 Bland-Altman plots. Both ICC and Bland-Altman analyses were performed separately for  
201 each time-point T1-T5. The overall ICC and Bland-Altman analyses were not adjusted for  
202 repeated measurements as these were performed under varying intra- and postoperative  
203 conditions. Normality and homoscedasticity were assessed in residual plots. An alpha of 0.05  
204 was considered significant.

## 205 Results

206 A total of 85 paired measurements of  $EVO_2$  and  $GVO_2$  were obtained in 20 subjects; 58 were  
207 obtained intraoperatively and 27 in the postoperative period. Four paired intraoperative  
208 measurements were not performed due to early termination of surgery (unexpected metastatic  
209 spread of malignancy) in two patients. Thirteen paired measurements could not be performed  
210 in the postoperative period because of technical or arterial line failure (n=2), logistical reasons  
211 (n=2), patients' decline (n=3), exclusion due to short postoperative stay (n=4) and need for  
212 supplemental oxygen (n=2). Correct positioning of the CVC was confirmed by postoperative  
213 chest x-ray in all patients.

214

215 **Fig 1. CONSORT flow diagram.** Enrollment and assessment of estimated ( $EVO_2$ ) and  
216 measured ( $GVO_2$ ) oxygen consumption (n) patients.

217

218 There was a overall mean difference between  $EVO_2$  and  $GVO_2$  [ $F(1, 167) = 72.8, P < 0.0001$ ]  
219 estimated to  $-26$  (95% CI  $-20$  to  $-32; P < 0.001$ )  $ml\ min^{-1}m^{-2}$ . This difference was largely  
220 unchanged at the different time-points [ $F(4, 168) = 1.39, P = 0.241$ ]. The means of  $GVO_2$  and  
221  $EVO_2$  at the different perioperative time-points (T1-T5) are presented in Fig 1.

222 **Fig 2. Oxygen consumption ( $VO_2$ ) at each perioperative time-point (T1-5).**  $EVO_2$   
223 (estimated from minimal-invasive cardiac output and arterial-central venous blood sampling)  
224 and  $GVO_2$  (indirect calorimetry) expressed as mean (95% CI)  $ml\ min^{-1} m^{-2}$ .

225

226  $GVO_2$  and  $EVO_2$  changed in parallel when separated to the anaesthetised intraoperative state  
227 [ $F(2, 49.9) = 0.57, P = 0.5669$ ] and the awake postoperative state  $F(1, 22) = 0.00, P = 0.9604$ ,  
228 see Figs 2a-b. An overall association between  $GVO_2$  and  $EVO_2$  was demonstrated in a  
229 random coefficient model (Fig 3). The two patients with early termination of surgery were  
230 excluded from this analysis. The variances of  $EVO_2$  and its components, oxygen content  
231 difference in arterial and central venous blood ( $Ca-cvO_2$ ) and cardiac index ( $CI$ ) were larger  
232 compared to  $GVO_2$  at all time-points, these analyses are presented in Suppl S1.

233

234 **Figs 3a-b. Results from the mixed effect models on perioperative changes of  $GVO_2$  (red)  
235 and  $EVO_2$  (black).** Least square means estimates with 95% CI and normalised to overall  
236 means (=1.0) of each method in anaesthetised intraoperative (T1-T3) and awake postoperative

237 states (T4-T5). (T1) anaesthesia; Early surgery (T2); Late surgery (T3); Early postop (T4);  
238 Late postop (T5).

239 **Fig 4.** A random coefficient model for predicted GVO<sub>2</sub> from EVO<sub>2</sub> based on all perioperative  
240 time-points.  $GVO_2 = \beta_0 + \beta_1 (EVO_2)$ .

241 The traditional agreement analyses are presented as supplementary results. The overall  
242 unadjusted mean bias was 26 ml min<sup>-1</sup> m<sup>-2</sup> with limits of agreement (1.96SD) of -32 to 85 ml  
243 min<sup>-1</sup>m<sup>-2</sup>. Excluding one outlier in the late postoperative period (a patient with a large Ca-  
244 cvO<sub>2</sub> difference) changed the unadjusted bias to 28 (LoA -20 to 75) ml min<sup>-1</sup> m<sup>-2</sup>. Bland-  
245 Altman plots were constructed to illustrate the bias and limits of agreement at the different  
246 time-points Suppl S2. The overall correlation for *absolute* agreement was poor, with an  
247 intraclass coefficient ICC(A,1) of 0.37 (95% CI 0.34 to 0.65) [F(84,10.2)=3.07, P=0.0266],  
248 and did not improve much when adjusted for lower overall mean difference of EVO<sub>2</sub>,  
249 ICC(A,1)=0.51 (95% CI 0.34 to 0.65) [F(84, 84) = 3.07, P<0.001]. Graphs depicting the  
250 correlation between indexed GVO<sub>2</sub> and EVO<sub>2</sub> at the different time-points (T1-5) including the  
251 unadjusted overall correlation are presented in Suppl S3.

252

253

254

255

256

257

258

259

260

261

262

263

264



## 265 Discussion

266 Estimates of increased oxygen extraction, i.e low mixed or central venous saturation, are  
267 associated with poor surgical outcomes.(16, 17) However, cut-off levels remain unclear and  
268 the quality of evidence is low.(18) In order to further study and distinguish the role of oxygen  
269 consumption in the perioperative period, feasible estimations are needed. To the best of our  
270 knowledge, this is the first pilot study investigating how a Fick-derived estimation method  
271 based on minimal-invasive haemodynamic monitoring (LiDCO™plus and blood gas  
272 sampling from arterial and central venous lines) can be used intra- and postoperatively. As  
273 expected, this estimation method had poor agreement concerning absolute values when  
274 compared to indirect calorimetry, but approximate to previous studies using pulmonary artery  
275 catheters.(11, 19-21) Importantly, the estimations based on routine haemodynamic monitoring  
276 for major surgery, were shown to change in parallel with the metabolic measurements in the  
277 perioperative period. We suggest that this or similar methods could be evaluated in larger  
278 samples and related to clinical outcomes.

279

280 Most previous studies investigating methods for oxygen consumption monitoring  
281 perioperatively or in critically ill patients were performed decades ago using traditional  
282 method comparison analytical methods. Some of the earlier method comparison studies are  
283 summarised in Table 1. Newer studies using non-invasive cardiac output monitors have not  
284 shown agreement with oxygen consumption measurements from indirect calorimetry(22) or  
285 pulmonary artery catheters.(23) However, the monitors used were not calibrated by  
286 transpulmonary or indicator dilution such as the PiCCO™ or LiDCO™plus systems and did  
287 not analyse changes over time.

288

289 **Table 1 Examples of previous studies comparing methods for gas-derived VO<sub>2</sub> with**  
290 **Fick-derived VO<sub>2</sub>.** Abbreviations: IC; indirect calorimetry: PAC; pulmonary artery catheter:  
291 B-A; Bland-Altman method for assessing agreement: ANOVA; analysis of variance; PE: pure  
292 error; RE: relative error: ICU; intensive care unit: CC; closed circuit anaesthesia system:  
293 CVC; central venous catheter: PDD; pulse dye densitometry: \* no overall LoA. \*\* derived  
294 from graph \*\*\*pre-CPB measurements

295

296 A feasible oxygen consumption estimation method does not necessarily have to demonstrate  
297 perfect agreement to reflect changes in the perioperative period. Time effects and repeated

298 measurements in the same subject under changing conditions are important statistical  
299 challenges in studies involving perioperative patients. Previous studies have often used simple  
300 linear regression or correlation(9, 10, 22, 24) or Bland-Altman analysis(25) without correction  
301 for repeated measurements(11, 22, 26, 27) except for some.(21, 28) Only a few addressed the  
302 relationship between measurements over time.(19, 29) In the present study, we developed a  
303 prediction model for  $EVO_2$  and  $GVO_2$  by using a random coefficient model based on  
304 individual slopes and intercepts. A significant positive association was demonstrated here, but  
305 such prediction models should obviously be evaluated in larger samples. We also present  
306 analyses of relative changes of  $EVO_2$  and its components with  $GVO_2$ . The parallelity that was  
307 demonstrated could indicate an ability of  $EVO_2$  to track changes in oxygen consumption. To  
308 address this further, multiple measurements during shorter periods of time would be required.  
309 Analytic models previously used for cardiac output monitors such as polar plot approaches  
310 could be used to assess the magnitude and direction of changes.(30) Intraclass correlation  
311 (ICC) was used as it better reflects reliability and agreement based on analysis of variance of  
312 the pooled data.(31) When adjusted for the consistently lower values of  $EVO_2$ , the ICC  
313 estimates of the model improved but not so much (ICC coefficient 0.51 vs 0.37). Bland-  
314 Altman analysis has since long been the standard method for visualisation of agreement when  
315 comparing different methods of  $VO_2$  monitoring.(21) Myles and Cui further elaborated the  
316 methodological issues related to repeated measurements in the same subject already  
317 considered by Bland and Altman(32) and proposed different random effects models to adjust  
318 limits of agreement.(21) As measurements were performed under varying perioperative  
319 conditions, we present the time-points separately and did not adjust the overall limits of  
320 agreement for repeated measurements in the same patient.

321  
322 Oxygen consumption calculated by the reverse Fick equation is consistently reported lower  
323 than simultaneous measurements by analysis of respiratory gas exchange.(7, 9-11, 19, 24, 26,  
324 28, 29, 33-36) This difference or bias has been attributed to the pulmonary oxygen  
325 consumption.(35, 37, 38) However, variability of Fick-derived measurements(34, 36)and  
326 wide limits of agreement(21) has made it difficult to estimate a systematic methodological  
327 bias. Many previous studies have either been performed in thoracic or cardiovascular  
328 surgery(9-11, 19, 37) or in critically ill patients.(24, 26, 36, 39) Pulmonary  $VO_2$  can be  
329 expected to increase after thoracic surgery(11) and in intensive care patients with varying  
330 degrees of lung injury.(40) Some studies that involve patients undergoing predominately  
331 abdominal surgery have shown acceptable agreement between the methods.(27, 41)The age of

332 the studies is also reflected by the frequent use of the Deltatrac Metabolic Monitor® (Datex  
333 Instrumentarium, Helsinki, Finland), a metabolic monitor using a mixing-chamber technique  
334 and which is no longer in production. Many metabolic monitors in modern clinical use are  
335 based on breath-by-breath technology such as the Es-COVX® (GE Healthcare, Helsinki,  
336 Finland) or the QuarkRMR® in our study. Although there is supporting evidence for some  
337 overestimation of  $\text{VO}_2$ , the technology has shown clinically acceptable agreement when  
338 compared with mixing-chamber methods(42, 43) and it has been validated in the semi-closed  
339 circle absorber systems commonly used in anaesthesia.(44) Our results on  $\text{GVO}_2$  were  
340 comparable with studies using Deltatrac II when corrected for difference in units (*Table 1*).  
341 The estimations of oxygen consumption rely on accurate cardiac output determinations and  
342 oxygen content difference measurements. The LiDCO™plus has shown acceptable  
343 performance against the pulmonary artery catheter and other devices in cross-comparisons in  
344 cardiac output accuracy studies. (45, 46) During rapidly changing haemodynamic situations,  
345 concerns regarding trending ability and underestimation of cardiac output have been  
346 raised.(30, 47) The 20-minute data extraction periods in this study were specifically chosen to  
347 represent perioperative time points that usually are without considerable circulatory  
348 instability. Central and mixed venous oxygen saturation have not shown  
349 interchangeability(48-50) but some studies have suggested that trends in  $\text{ScvO}_2$  can replace  
350  $\text{SvO}_2$ .(51-53) During stable intraoperative conditions, oxygen content difference is not  
351 expected to vary to a large extent whereas cardiac output can show considerable in- and  
352 between patient variability.(23) In our study, oxygen content difference and cardiac output  
353 demonstrated similar coefficients of variation.

354  
355 The present study has several major limitations in addition to those discussed above. The  
356 sample size and number of observations are small, although in the same range as many earlier  
357 studies comparing calculated and measured  $\text{VO}_2$ , and this could explain the large variability  
358 of  $\text{EVO}_2$ . There was a considerable loss of data in the postoperative period limiting the  
359 conclusions on changes over time.

360  
361 In summary, we have evaluated an oxygen consumption method that requires no extra  
362 equipment if perioperative CO-monitoring and CVC are used. Our results indicate that the  
363 performance could be equivalent to pulmonary artery catheters, and we have demonstrated  
364 parallelity in changes over time. Compared to earlier studies, we have used modern and  
365 commonly used calibrated CO-monitoring. We have also addressed the relationship between

366 measurements over time using updated statistical analysis. The results should be regarded as  
367 indicative and further studies on larger samples are needed to establish if this method of  
368 estimating perioperative VO<sub>2</sub> can prove useful.

369

## 370 **Acknowledgements**

371 The authors would like to thank research assistant nurses at the Clinical Research Unit, Dept.  
372 of Upper Abdominal Surgery, Karolinska University Hospital Huddinge, Birgitta Holmberg  
373 and Sirje Laur, for their help in recruiting and informing the patients included in this study.

374 Statements and declarations: The authors have no conflicts of interest to declare.

375

## 376 **References**

377

- 378 1. Shoemaker WC, Appel PL, Kram HB. Hemodynamic and oxygen transport responses in  
379 survivors and nonsurvivors of high-risk surgery. *Crit Care Med.* 1993;21(7):977-90.
- 380 2. Grocott MP, Dushianthan A, Hamilton MA, Mythen MG, Harrison D, Rowan K, et al.  
381 Perioperative increase in global blood flow to explicit defined goals and outcomes following  
382 surgery. *Cochrane Database Syst Rev.* 2012;11:CD004082.
- 383 3. Maheshwari K. Principles for minimizing oxygen debt: can they translate to clinical  
384 application and improve outcomes? *Best Practice & Research Clinical Anaesthesiology.* 2020.
- 385 4. Jakobsson J, Vadman S, Hagel E, Kalman S, Bartha E. The effects of general anaesthesia  
386 on oxygen consumption: A meta-analysis guiding future studies on perioperative oxygen  
387 transport. *Acta Anaesthesiol Scand.* 2019;63(2):144-53.
- 388 5. Carsetti A, Amici M, Bernacconi T, Brancaloni P, Cerutti E, Chiarello M, et al. Estimated  
389 oxygen extraction versus dynamic parameters of fluid-responsiveness for perioperative  
390 hemodynamic optimization of patients undergoing non-cardiac surgery: a non-inferiority  
391 randomized controlled trial. *BMC anesthiol.* 2020;20(1):87.
- 392 6. Biro P. A formula to calculate oxygen uptake during low flow anesthesia based on FIO<sub>2</sub>  
393 measurement. *J Clin Monit Comput.* 1998;14(2):141-4.
- 394 7. Leonard IE, Weitkamp B, Jones K, Aittomaki J, Myles PS. Measurement of systemic  
395 oxygen uptake during low-flow anaesthesia with a standard technique vs. a novel method.  
396 *Anaesthesia.* 2002;57(7):654-8.
- 397 8. McLellan S, Walsh TS. Oxygen delivery and haemoglobin. *Cont Ed Anaesth Crit Care*  
398 *Pain* 2004;4(4):123-6.
- 399 9. Keinanen O, Takala J. Calculated versus measured oxygen consumption during and after  
400 cardiac surgery. Is it possible to estimate lung oxygen consumption? *Acta Anaesthesiol*  
401 *Scand.* 1997;41(7):803-9.
- 402 10. Peyton PJ, Robinson GJ. Measured pulmonary oxygen consumption: difference between  
403 systemic oxygen uptake measured by the reverse Fick method and indirect calorimetry in  
404 cardiac surgery. *Anaesthesia.* 2005;60(2):146-50.
- 405 11. Saito H, Minamiya Y, Kawai H, Motoyama S, Katayose Y, Kimura K, et al. Estimation of  
406 pulmonary oxygen consumption in the early postoperative period after thoracic surgery.  
407 *Anaesthesia.* 2007;62(7):648-53.

- 408 12. Jakobsson J, Noren C, Hagel E, Kalman S, Bartha E. Peri-operative oxygen consumption  
409 revisited: An observational study in elderly patients undergoing major abdominal surgery. *Eur*  
410 *J Anaesthesiol.* 2021;38(1):4-12.
- 411 13. Wasserman K. Principles of exercise testing and interpretation including pathophysiology  
412 and clinical applications. 5th ed. Philadelphia: Wolters Kluwer Health/Lippincott Williams &  
413 Wilkins; 2012.
- 414 14. Dunn JO MM, Grocott MP. Physiology of oxygen transport. *BJA Ed.* 2016;16(10):341-8.
- 415 15. Wang Y, Moss J, Thisted R. Predictors of body surface area. *J Clin Anesth.* 1992;4(1):4-  
416 10.
- 417 16. van Beest P, Wietasch G, Scheeren T, Spronk P, Kuiper M. Clinical review: use of venous  
418 oxygen saturations as a goal - a yet unfinished puzzle. *Crit Care.* 2011;15(5):232.
- 419 17. Pearse R, Dawson D, Fawcett J, Rhodes A, Grounds RM, Bennett ED. Changes in central  
420 venous saturation after major surgery, and association with outcome. *Crit Care.*  
421 2005;9(6):R694-9.
- 422 18. Chemtob RA, Eskesen TG, Moeller-Soerensen H, Perner A, Ravn HB. Systematic review  
423 of the association of venous oxygenation and outcome in adult hospitalized patients. *Acta*  
424 *Anaesthesiol Scand.* 2016;60(10):1367-78.
- 425 19. Bizouarn P, Soulard D, Blanloeil Y, Guillet A, Goarin Y. Oxygen consumption after  
426 cardiac surgery--a comparison between calculation by Fick's principle and measurement by  
427 indirect calorimetry. *Intensive Care Med.* 1992;18(4):206-9.
- 428 20. Hofland J, Tenbrinck R, Eggermont AM, Eijck CH, Gommers D, Erdmann W. Effects of  
429 simultaneous aortocaval occlusion on oxygen consumption in patients. *Clin Physiol Funct*  
430 *Imaging.* 2003;23(5):275-81.
- 431 21. Myles PS, Cui J. Using the Bland-Altman method to measure agreement with repeated  
432 measures. *Br J Anaesth.* 2007;99(3):309-11.
- 433 22. Inadomi C, Terao Y, Yamashita K, Fukusaki M, Takada M, Sumikawa K. Comparison of  
434 oxygen consumption calculated by Fick's principle (using a central venous catheter) and  
435 measured by indirect calorimetry. *J.* 2008;22(2):163-6.
- 436 23. Burtman DTM, Stolze A, Genaamd Dengler SEK, Vonk ABA, Boer C. Minimally  
437 Invasive Determinations of Oxygen Delivery and Consumption in Cardiac Surgery: An  
438 Observational Study. *J Cardiothorac Vasc Anesth.* 2018;32(3):1266-72.
- 439 24. Soussi S, Vallee F, Roquet F, Bevilacqua V, Benyamina M, Ferry A, et al. Measurement  
440 of Oxygen Consumption Variations in Critically Ill Burns Patients: Are the Fick Method and  
441 Indirect Calorimetry Interchangeable? *Shock.* 2017;48(5):532-8.
- 442 25. Bland JM, Altman DG. Statistical methods for assessing agreement between two methods  
443 of clinical measurement. *Lancet.* 1986;1(8476):307-10.
- 444 26. Epstein CD, Peerless JR, Martin JE, Malangoni MA. Comparison of methods of  
445 measurements of oxygen consumption in mechanically ventilated patients with multiple  
446 trauma: the Fick method versus indirect calorimetry. *Crit Care Med.* 2000;28(5):1363-9.
- 447 27. Hanique G, Dugernier T, Laterre PF, Dougnac A, Roeseler J, Reynaert MS. Significance  
448 of pathologic oxygen supply dependency in critically ill patients: comparison between  
449 measured and calculated methods. *Intensive Care Med.* 1994;20(1):12-8.
- 450 28. Hofland J, Tenbrinck R, van Eijck CH, Eggermont AM, Gommers D, Erdmann W.  
451 Comparison of closed circuit and Fick-derived oxygen consumption in patients undergoing  
452 simultaneous aortocaval occlusion. *Anaesthesia.* 2003;58(4):377-84.
- 453 29. Myles PS, McRae R, Ryder I, Hunt JO, Buckland MR. Association between oxygen  
454 delivery and consumption in patients undergoing cardiac surgery. Is there supply dependence?  
455 *Anaesth Intensive Care.* 1996;24(6):651-7.
- 456 30. Critchley LA, Lee A, Ho AM. A critical review of the ability of continuous cardiac output  
457 monitors to measure trends in cardiac output. *Anesth Analg.* 2010;111(5):1180-92.

- 458 31. Liljequist D, Elfving B, Skavberg Roaldsen K. Intraclass correlation - A discussion and  
459 demonstration of basic features. *PLoS ONE*. 2019;14(7):e0219854.
- 460 32. Bland JM, Altman DG. Measuring agreement in method comparison studies. *Stat*  
461 *Methods Med Res*. 1999;8(2):135-60.
- 462 33. Bizouarn P, Blanloeil Y, Pinaud M. Comparison between oxygen consumption calculated  
463 by Fick's principle using a continuous thermodilution technique and measured by indirect  
464 calorimetry. *Br J Anaesth*. 1995;75(6):719-23.
- 465 34. Smithies MN, Royston B, Makita K, Konieczko K, Nunn JF. Comparison of oxygen  
466 consumption measurements: indirect calorimetry versus the reversed Fick method. *Crit Care*  
467 *Med*. 1991;19(11):1401-6.
- 468 35. Stuart-Andrews C, Peyton P, Robinson G, Terry D, O'Connor B, Van der Hertten C, et al.  
469 Non-invasive metabolic monitoring of patients under anaesthesia by continuous indirect  
470 calorimetry--an in vivo trial of a new method. *Br J Anaesth*. 2007;98(1):45-52.
- 471 36. Walsh TS, Hopton P, Lee A. A comparison between the Fick method and indirect  
472 calorimetry for determining oxygen consumption in patients with fulminant hepatic failure.  
473 *Crit Care Med*. 1998;26(7):1200-7.
- 474 37. Loer SA, Scheeren TW, Tarnow J. How much oxygen does the human lung consume?  
475 *Anesthesiology*. 1997;86(3):532-7.
- 476 38. Oudemans-van Straaten HM, Scheffer GJ, Eysman L, Wildevuur CR. Oxygen  
477 consumption after cardiopulmonary bypass--implications of different measuring methods.  
478 *Intensive Care Med*. 1993;19(2):105-10.
- 479 39. Schaffartzik W, Sanft C, Schaefer JH, Spies C. Different dosages of dobutamine in septic  
480 shock patients: determining oxygen consumption with a metabolic monitor integrated in a  
481 ventilator. *Intensive Care Med*. 2000;26(12):1740-6.
- 482 40. Jolliet P, Thorens JB, Nicod L, Pichard C, Kyle U, Chevrolet JC. Relationship between  
483 pulmonary oxygen consumption, lung inflammation, and calculated venous admixture in  
484 patients with acute lung injury. *Intensive Care Med*. 1996;22(4):277-85.
- 485 41. Brandi LS, Bertolini R, Pieri M, Giunta F, Calafa M. Comparison between cardiac output  
486 measured by thermodilution technique and calculated by O<sub>2</sub> and modified CO<sub>2</sub> Fick methods  
487 using a new metabolic monitor. *Intensive Care Med*. 1997;23(8):908-15.
- 488 42. Allingstrup MJ, Kondrup J, Perner A, Christensen PL, Jensen TH, Henneberg SW.  
489 Indirect Calorimetry in Mechanically Ventilated Patients: A Prospective, Randomized,  
490 Clinical Validation of 2 Devices Against a Gold Standard. *JPEN J Parenter Enteral Nutr*.  
491 2017;41(8):1272-7.
- 492 43. Rehal MS, Fiskaare E, Tjader I, Norberg A, Rooyackers O, Wernerman J. Measuring  
493 energy expenditure in the intensive care unit: a comparison of indirect calorimetry by E-  
494 sCOVX and Quark RMR with Deltatrac II in mechanically ventilated critically ill patients.  
495 *Crit Care*. 2016;20:54.
- 496 44. Stuart-Andrews CR, Peyton P, Robinson GJ, Terry D, O'Connor B, Van der Hertten C, et  
497 al. In vivo validation of the M-COVX metabolic monitor in patients under anaesthesia.  
498 *Anaesth Intensive Care*. 2007;35(3):398-405.
- 499 45. Lamia B, Kim HK, Severyn DA, Pinsky MR. Cross-comparisons of trending accuracies of  
500 continuous cardiac-output measurements: pulse contour analysis, bioreactance, and  
501 pulmonary-artery catheter. *J Clin Monit Comput*. 2018;32(1):33-43.
- 502 46. Hadian M, Kim HK, Severyn DA, Pinsky MR. Cross-comparison of cardiac output  
503 trending accuracy of LiDCO, PiCCO, FloTrac and pulmonary artery catheters. *Crit Care*.  
504 2010;14(6):R212.
- 505 47. Beattie C, Moores C, Thomson AJ, Nimmo AF. The effect of anaesthesia and aortic  
506 clamping on cardiac output measurement using arterial pulse power analysis during aortic  
507 aneurysm repair. *Anaesthesia*. 2010;65(12):1194-9.

- 508 48. Lequeux PY, Bouckaert Y, Sekkat H, Van der Linden P, Stefanidis C, Huynh CH, et al.  
509 Continuous mixed venous and central venous oxygen saturation in cardiac surgery with  
510 cardiopulmonary bypass. *Eur J Anaesthesiol.* 2010;27(3):295-9.
- 511 49. van Beest PA, van Ingen J, Boerma EC, Holman ND, Groen H, Koopmans M, et al. No  
512 agreement of mixed venous and central venous saturation in sepsis, independent of sepsis  
513 origin. *Crit Care.* 2010;14(6):R219.
- 514 50. Soussi MS, Jebali MA, Le Manach Y, Nasri M, Zouari B, Chenik S, et al. Central venous  
515 saturation is not an alternative to mixed venous saturation during cardiopulmonary bypass in  
516 coronary artery surgery patients. *Perfusion.* 2012;27(4):300-6.
- 517 51. Reinhart K, Kuhn HJ, Hartog C, Bredle DL. Continuous central venous and pulmonary  
518 artery oxygen saturation monitoring in the critically ill. *Intensive Care Med.* 2004;30(8):1572-  
519 8.
- 520 52. el-Masry A, Mukhtar AM, el-Sherbeny AM, Fathy M, el-Meteini M. Comparison of  
521 central venous oxygen saturation and mixed venous oxygen saturation during liver  
522 transplantation. *Anaesthesia.* 2009;64(4):378-82.
- 523 53. Dueck MH, Klimek M, Appenrodt S, Weigand C, Boerner U. Trends but not individual  
524 values of central venous oxygen saturation agree with mixed venous oxygen saturation during  
525 varying hemodynamic conditions. *Anesthesiology.* 2005;103(2):249-57.
- 526  
527

## 528 **Supporting information**

529 **S1 File**

530 **S2 File**

531 **S3 File**

| Author, year                                               | Subjects, N=                         | Number of paired measurements | Method derived $\text{VO}_2$ gas-      | Method derived $\text{VO}_2$ Fick- | Bias (SD or 95% CI), limits of agreement in $\text{ml min}^{-1} \text{m}^{-2}$ | Statistical methodology                            |
|------------------------------------------------------------|--------------------------------------|-------------------------------|----------------------------------------|------------------------------------|--------------------------------------------------------------------------------|----------------------------------------------------|
| Bizouarn et al. <sup>16</sup> , 1992                       | Postop cardiac surgery, N=10         | 50                            | IC Deltatrac®                          | PAC thermodilution                 | 34 (SD 27)<br>LoA: -33 to 88                                                   | B-A<br>ANOVA for time-effects                      |
| Bizouarn et al. <sup>22</sup> , 1995                       | Postop cardiac surgery, N=9          | 54                            | IC Deltatrac®                          | PAC (continuous thermodilution)    | 15 (95% CI, 13 to 17)<br>LoA: -3 to 33                                         | B-A<br>PE-RE                                       |
| Epstein et al. <sup>12</sup> , 2000                        | Trauma ICU, N=38                     | 152                           | IC Puritan Bennett®                    | PAC thermodilution                 | 41 (95% CI, 20 to 63)<br>LoA*: lower -40 to -72, upper 120 to 149              | B-A                                                |
| Hofland et al. <sup>14</sup> , 2003                        | Intraop vascular surgery, N=11       | 73                            | CC Physioflex®                         | PAC thermodilution                 | 36 (not presented)<br>LoA**: -40 to 112                                        | B-A<br>Linear regression/Spearman rank correlation |
| Inadomi et al. <sup>5</sup> , 2008                         | Postop major abdominal surgery, N=28 | 56                            | IC Puritan Bennett®                    | CVC+PDD                            | 33 (not presented)<br>LoA: -31 to 97                                           | B-A<br>Linear regression                           |
| Keinanen and Takala <sup>7</sup> , 1997                    | Periop cardiac surgery, N=9          | 45                            | IC Deltatrac®                          | PAC thermodilution                 | 33 (25)<br>LoA (not analysed)                                                  | Linear regression<br>ANOVA                         |
| Leonard et al. <sup>4</sup> , 2002                         | Periop cardiac surgery, N=29         | 29***                         | CC Biro method                         | PAC thermodilution                 | 75 (121)<br>LoA: -162 to 311                                                   | B-A                                                |
| Myles et al. <sup>17</sup> 1996/revised <sup>15</sup> 2007 | Periop cardiac surgery, N=20         | 143                           | IC Deltatrac®                          | PAC thermodilution                 | 20 (50)<br>LoA -128 to 88,<br>revised 30 (-116 to 57)                          | B-A (1996)<br>Random effects model (2007)          |
| Peyton and Robinson <sup>8</sup> , 2005                    | Intraop cardiac surgery, N=9         | 18                            | Modified Bains circuit                 | PAC thermodilution                 | 19 (20) (95% CI, 9 to 29) $\text{ml min}^{-1}$<br>LoA (not analysed)           | Mean difference                                    |
| Saito et al. <sup>9</sup> , 2007                           | Periop oesophagectomy, N=35          | 210                           | IC Deltatrac®                          | PAC thermodilution                 | 23 (95% CI, 20 to 27)<br>LoA: -23 to 69                                        | B-A<br>Correlation<br>Difference over time         |
| Smithies et al. <sup>23</sup> , 1991                       | General ICU, N=8                     | 20                            | CC spirometry                          | PAC thermodilution                 | 36 (SD29) $\text{ml min}^{-1}$<br>LoA (not analysed)                           | Mean difference                                    |
| Soussi et al. <sup>10</sup> , 2017                         | ICU burns patients, N=22             | 44                            | IC E-COVX®                             | CVC +PiCCO®                        | 60 (not presented)<br>LoA: -84 to 203                                          | Linear regression<br>Bland-Altman                  |
| Stuart-Andrews et al. <sup>24</sup> , 2007                 | Intraop cardiac surgery, N=30        | 30***                         | Modified semi-closed breathing circuit | PAC thermodilution                 | 21 (25)<br>LoA (overall in graph)                                              | Correlation<br>Bland-Altman                        |
| Walsh et al. <sup>25</sup> , 1998                          | ICU hepatic failure, N=17            | 98                            | IC Deltatrac®                          | PAC thermodilution                 | -41(30) (95 % CI, -31 to -47)<br>LoA: -101 to 19<br>(Fick - Gas)               | Bland-Altman<br>Repeatability                      |

Table 1



medRxiv preprint doi: <https://doi.org/10.1101/2022.07.18.22277772>; this version posted July 21, 2022. The copyright holder for this preprint (which was not certified by peer review) is the author/funder, who has granted medRxiv a license to display the preprint in perpetuity. It is made available under a [CC-BY 4.0 International license](https://creativecommons.org/licenses/by/4.0/).

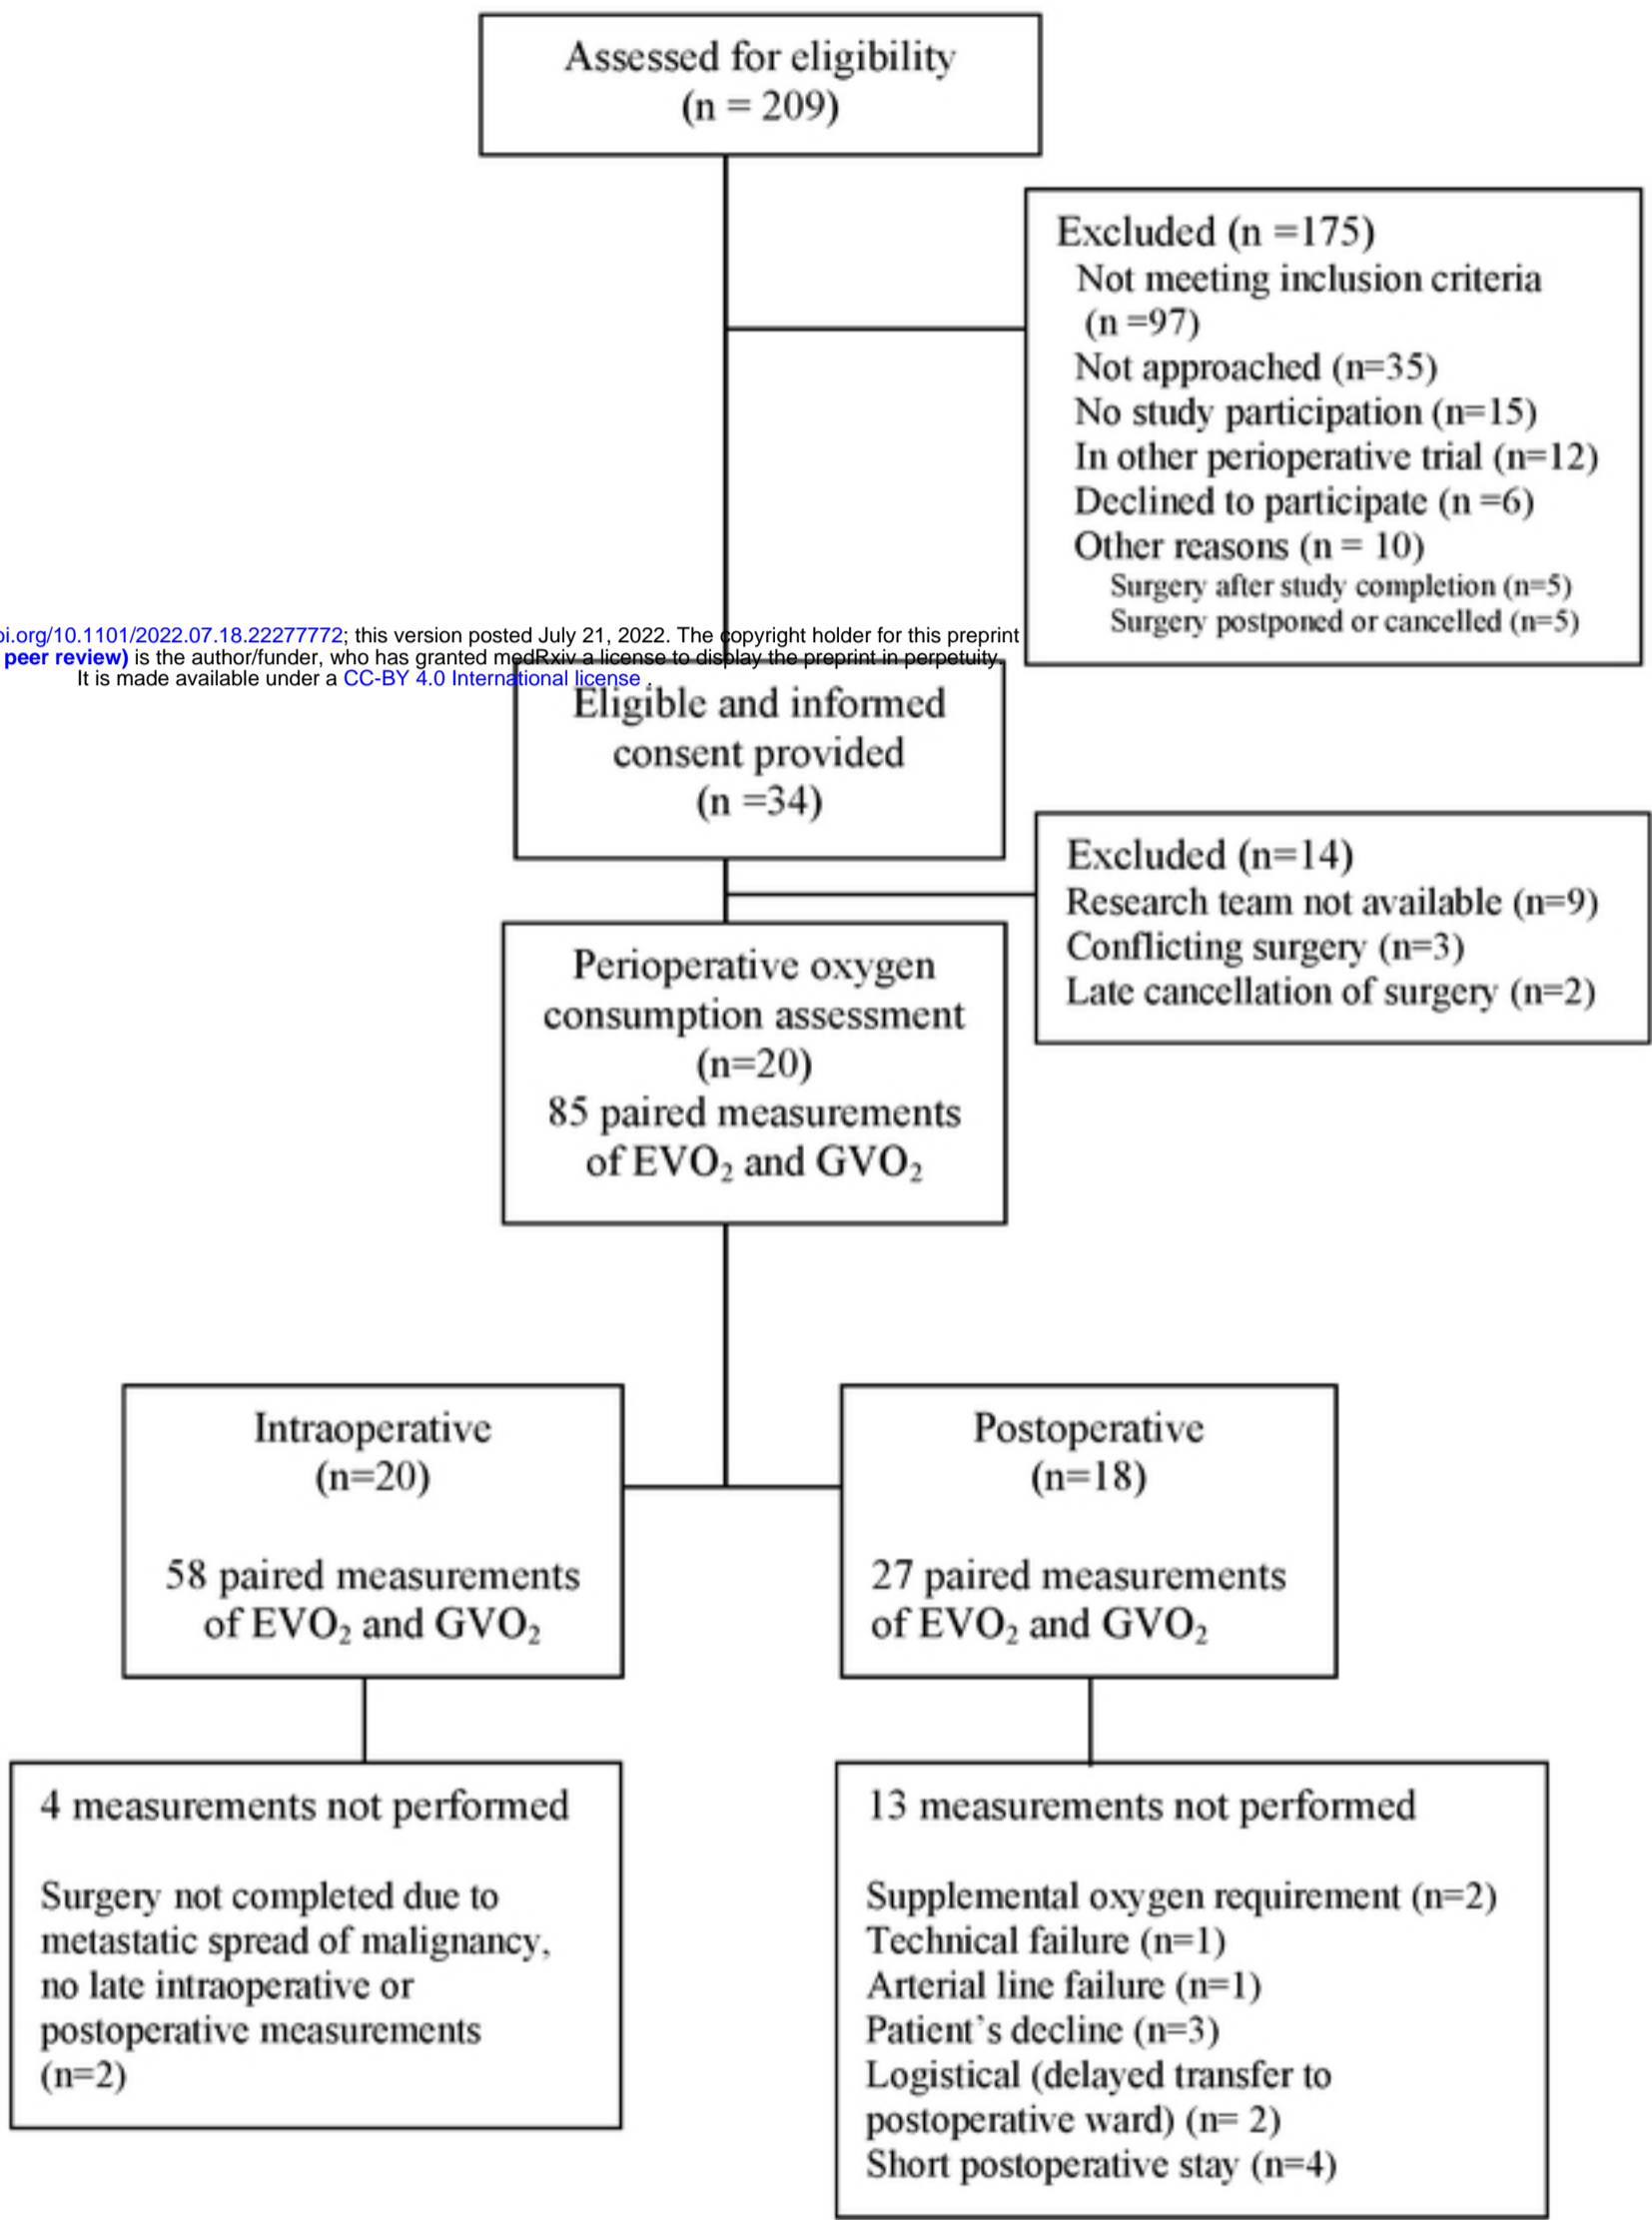

Figure 1

medRxiv preprint doi: <https://doi.org/10.1101/2022.07.18.22277772>; this version posted July 21, 2022. The copyright holder for this preprint (which was not certified by peer review) is the author/funder, who has granted medRxiv a license to display the preprint in perpetuity. It is made available under a [CC-BY 4.0 International license](https://creativecommons.org/licenses/by/4.0/).



Figure 1

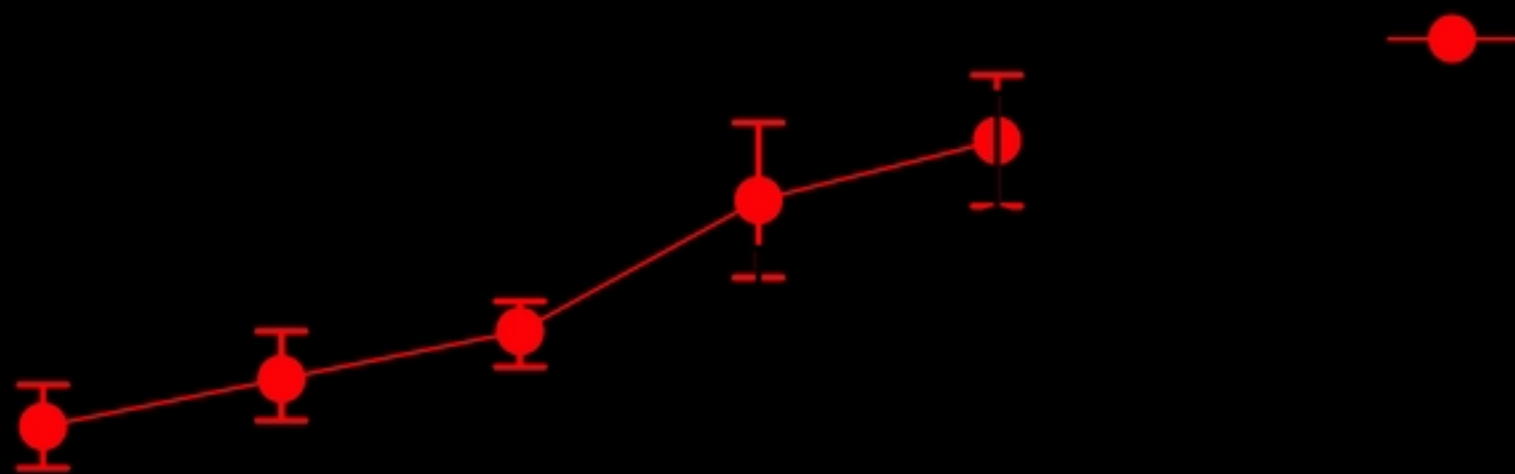

Figure 2

Intraoperative changes: EVO<sub>2</sub> and GVO<sub>2</sub>

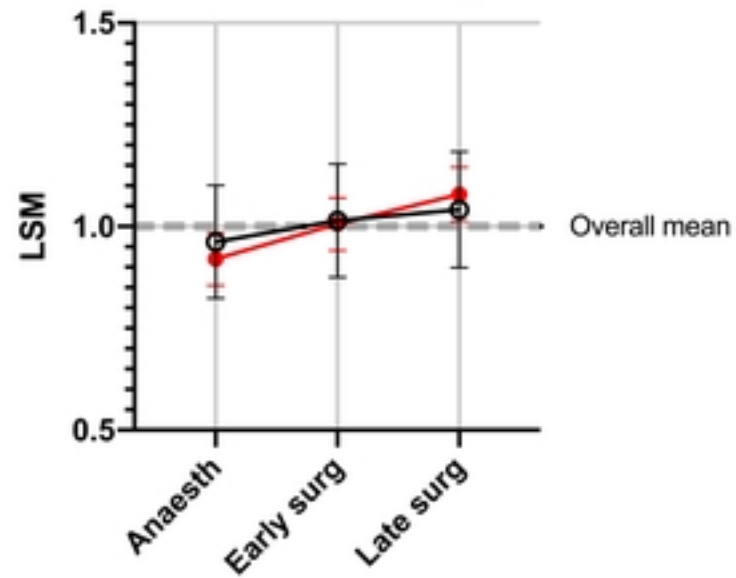

Postoperative changes: EVO<sub>2</sub> and GVO<sub>2</sub>

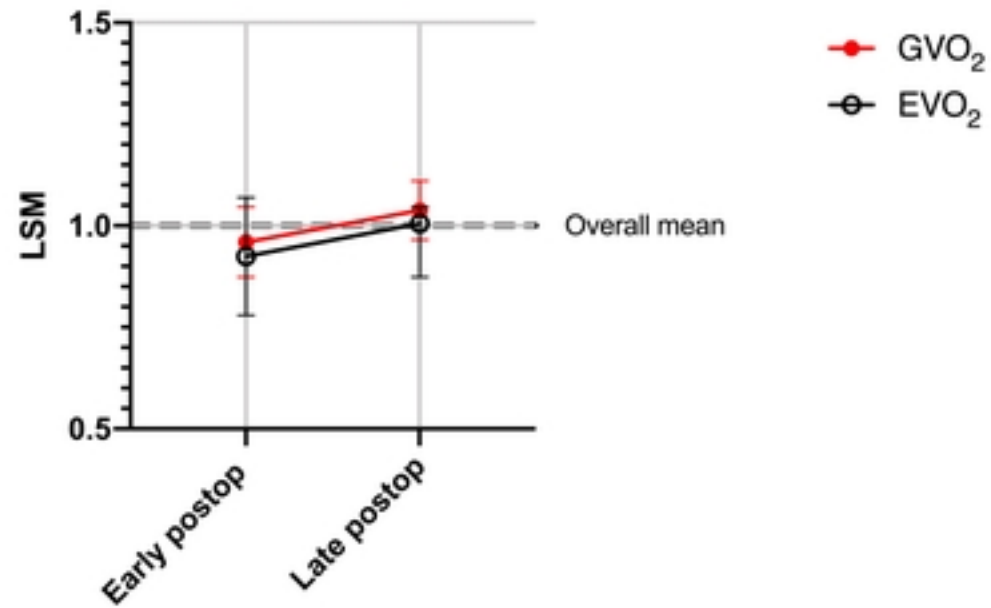

Figure 3

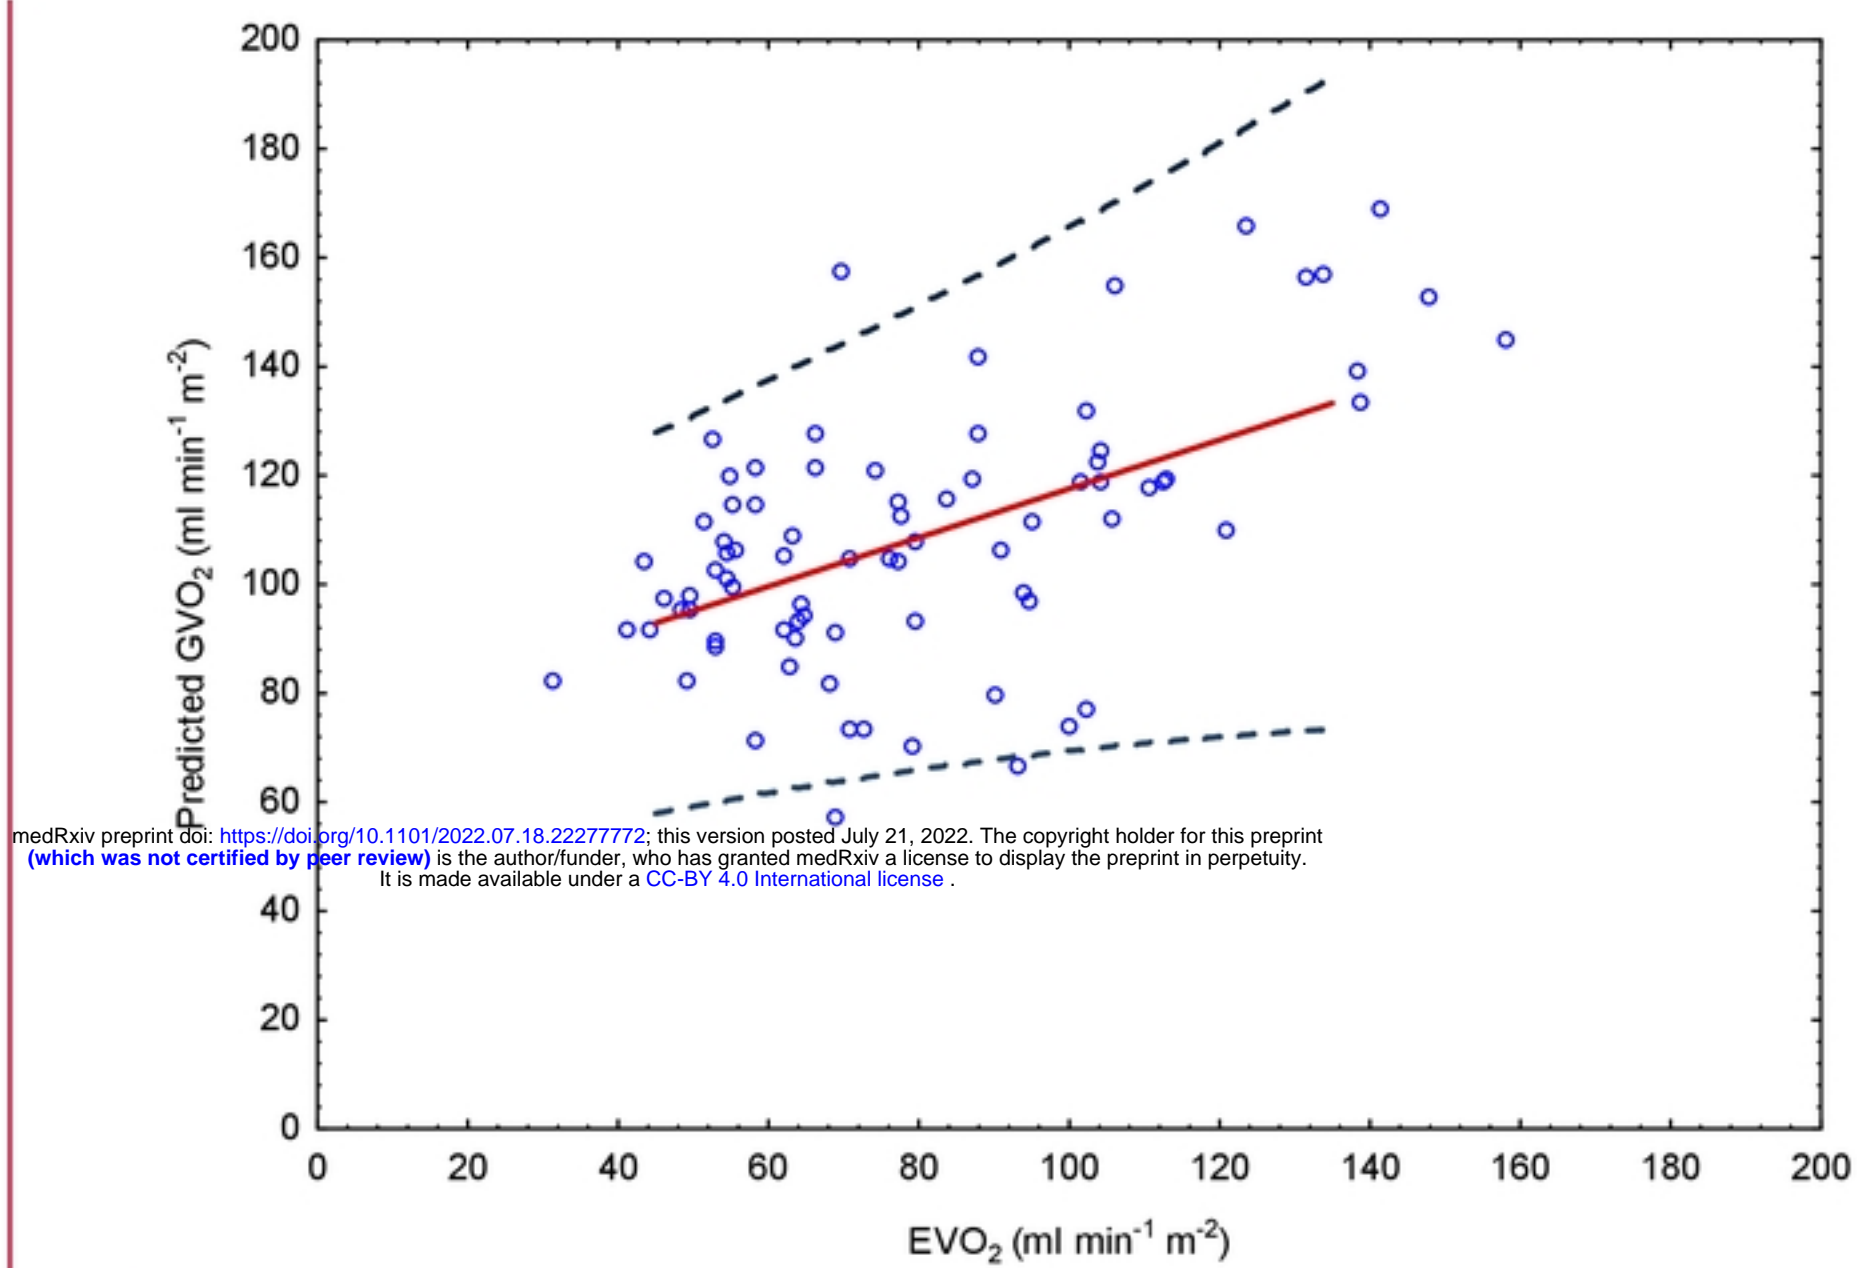

| <b>INTERCEPT <math>\beta_0</math></b> | <b>ST.ERROR</b> | <b>df</b> | <b>t-value</b> | <b>Lower 95%CI</b> | <b>Upper 95%CI</b> | <b>p-value</b> |
|---------------------------------------|-----------------|-----------|----------------|--------------------|--------------------|----------------|
| <b>SLOPE <math>\beta_1</math></b>     |                 |           |                |                    |                    |                |
| $\beta_0 = 72.69$                     | 5.04            | 17        | 14.43          | 62.06              | 83.32              | <0.0001        |
| $\beta_1 = 0.449$                     | 0.0742          | 17        | 6.05           | 0.292              | 0.605              | <0.0001        |

Figure 4
